# Supplementary material for: Mapping of in vivo cleavage sites uncovers a major role for yeast RNase III in regulating protein-coding genes
Source: eLife. 2026 May 18;14:RP106662. doi: 10.7554/eLife.106662 (PMC13183374; doi:10.7554/eLife.106662)
Supplement: Supplementary file 1. [file elife-106662-supp1.xlsx]

## Sheet: Supplemental Table 1
Substrate #	Gene name	Systematic name	Chromosome	Start	End	Strand	Location	Known substrate?	Average in vivo Log2 FC	Cleaved in vitro?**	Average in vitro Log2 FC*	Comments
1	tP(UGG)Q/Q0010	YNCQ0001W/Q0010	2micron	2428	2429	+	intergenic	N	4.84023	Y	6.77951		*Average in vitro Log2 FC between 0 pmol Rnt1 and 8 pmol Rnt1
2	FRT2	YAL028W	I	93936	93937	+	ORF	N	8.05385	Y	8.63027		**Determined to be cleaved in vitro if Log2 FC (between 0 and 8 pmol Rnt1) ≥ 4
2	FRT2	YAL028W	I	93937	93938	+	ORF	N	6.57166	Y	9.53284		Presumed residual Rat1 processing and/or Dxo1 nibbling
3	SNR18 (U18)	YNCA0003W	I	142494	142495	+	snoRNA	Y	11.1333	N	0.0007995
3	SNR18 (U18)	YNCA0003W	I	142495	142496	+	snoRNA	Y	9.87136	N	0.00445	intronic
3	SNR18 (U18)	YNCA0003W	I	142496	142497	+	snoRNA	Y	8.71593	N	-1.35759	intronic
3	SNR18 (U18)	YNCA0003W	I	142497	142498	+	snoRNA	Y	7.42738	N	2.74304	intronic
4	YARWdelta6	YARWdelta6	I	183458	183459	-	antisense	N	8.10743	Y	5.08242
4	YARWdelta6	YARWdelta6	I	183459	183460	-	antisense	N	7.74122	Y	4.12615
5	YAR028W	YAR028W	I	185186	185187	+	ORF	N	8.80347	Y	7.61384
5	YAR028W	YAR028W	I	185187	185188	+	ORF	N	9.39397	Y	8.05345
6	SWH1/YAR047C	YAR042W/YAR047C	I	196673	196674	+	intergenic	N	5.94408	N	1.29005
7	EDE1/PIN4	YBL047C/YBL051C	II	126612	126613	-	intergenic	N	6.11977	Y	4.65849
7	EDE1/PIN4	YBL047C/YBL051C	II	126613	126614	-	intergenic	N	9.92174	Y	9.81848
8	PRE7	YBL041W	II	141669	141670	+	ORF	N	8.27743	N	-0.08442
8	PRE7	YBL041W	II	141671	141672	+	ORF	N	5.70083	Y	8.68777
8	PRE7	YBL041W	II	141704	141705	+	ORF	N	6.01193	N	-0.662865
8	PRE7	YBL041W	II	141706	141707	+	ORF	N	7.4086	N	0.923218
8	PRE7	YBL041W	II	141707	141708	+	ORF	N	7.57495	N	-0.300021
8	PRE7	YBL041W	II	141708	141709	+	ORF	N	7.28517	N	0.744775
9	MRPL16/APL3	YBL038W/YBL037W	II	147034	147035	+	intergenic	Y	8.06848	Y	9.87932
10	COQ1	YBR003W	II	243849	243850	+	ORF	N	8.2402	Y	7.52537
11	SCO2	YBR024W	II	289490	289491	-	antisense	N	6.84116	N	2.38185
12	RPS9B	YBR189W	II	605171	605172	+	ORF	N	6.84972	Y	6.93137
13	YBRCdelta19	YBRCdelta19	II	644625	644626	-	5'	N	7.65568	N	3.18696
14	LSR1 (U2)	YNCB0019C	II	680623	680624	-	snRNA	Y	5.82701	N	3.06313
14	LSR1 (U2)	YNCB0019C	II	680624	680625	-	snRNA	Y	7.12871	N	3.06568
14	LSR1 (U2)	YNCB0019C	II	680625	680626	-	snRNA	Y	10.3398	Y	9.91342
14	LSR1 (U2)	YNCB0019C	II	680660	680661	-	snRNA	Y	9.05255	N	2.25887
14	LSR1 (U2)	YNCB0019C	II	680661	680662	-	snRNA	Y	11.0221	Y	4.93522
14	LSR1 (U2)	YNCB0019C	II	680662	680663	-	snRNA	Y	7.22125	N	-1.50746
15	PCA1/PHO89	YBR295W/YBR296C	II	796673	796674	-	intergenic	N	6.7847	N	0
16	PHO89/YBR296C-A	YBR296C/YBR296C-A	II	798574	798575	-	intergenic	N	7.01317	N	0
16	PHO89/YBR296C-A	YBR296C/YBR296C-A	II	798585	798586	-	intergenic	N	7.40781	N	1.75965
16	PHO89/YBR296C-A	YBR296C/YBR296C-A	II	798587	798588	-	intergenic	N	7.92089	N	0
16	PHO89/YBR296C-A	YBR296C/YBR296C-A	II	798590	798591	-	intergenic	N	7.39877	N	0
17	YCLWdelta15/YCL021W-A	YCLWdelta15/YCL021W-A	III	83218	83219	+	intergenic	N	8.74581	Y	4.1555
18	SNR43	YNCC0003C	III	107753	107754	-	snoRNA	Y	7.36575	Y	9.53219	polycistronic
18	SNR43	YNCC0003C	III	107787	107788	-	snoRNA	Y	10.3627	Y	5.85263
18	SNR43	YNCC0003C	III	107788	107789	-	snoRNA	Y	8.21632	Y	6.3274
19	ADP1	YCR011C	III	135131	135132	-	ORF	N	8.09535	N	1.79579
19	ADP1	YCR011C	III	135133	135134	-	ORF	N	8.59594	Y	9.31845
19	ADP1	YCR011C	III	135166	135167	-	ORF	N	7.64837	N	0.60966
20	tQ(UUG)C/FEN2	YNCC0010C/YCR028C	III	169031	169032	+	intergenic	N	4.47529	N	-0.170471
20	tQ(UUG)C/FEN2	YNCC0010C/YCR028C	III	169033	169034	+	intergenic	N	4.10243	N	-1.36214
21	SNR65	YNCC0011W	III	177127	177128	+	snoRNA	Y	10.1296	Y	11.5411
22	PHO87	YCR037C	III	197059	197060	-	ORF	N	4.35081	N	0
23	FIG2	YCR089W	III	271775	271776	-	antisense	N	6.12147	N	2.62838
24	tT(AGU)C/YCR102W-A	YNCC0014W/YCR102W-A	III	303869	303870	+	intergenic	N	6.0351	N	0
25	RPL13A	YDL082W	IV	308964	308965	+	ORF	N	5.14148	N	3.77482
26	SNR63	YNCD0002C	IV	323470	323471	-	snoRNA	Y	6.45703	N	0.449616
26	SNR63	YNCD0002C	IV	323531	323532	-	snoRNA	Y	9.46626	Y	8.29602
27	BDF2	YDL070W	IV	332358	332359	+	ORF	Y	11.4519	Y	6.75218
27	BDF2	YDL070W	IV	332359	332360	+	ORF	Y	7.2801	N	0.0339187
27	BDF2	YDL070W	IV	332360	332361	+	ORF	Y	8.8485	N	-0.796757
27	BDF2	YDL070W	IV	332392	332393	+	ORF	Y	10.0935	Y	10.3752
27	BDF2	YDL070W	IV	332393	332394	+	ORF	Y	11.9931	Y	5.06534
27	BDF2	YDL070W	IV	332394	332395	+	ORF	Y	11.2919	N	2.48382
27	BDF2	YDL070W	IV	332395	332396	+	ORF	Y	5.05868	Y	5.05771
27	BDF2	YDL070W	IV	332396	332397	+	ORF	Y	6.28157	N	2.93215
27	BDF2	YDL070W	IV	332398	332399	+	ORF	Y	5.93099	N	0.973035
27	BDF2	YDL070W	IV	332403	332404	+	ORF	Y	5.68576	N	0.85803
27	BDF2	YDL070W	IV	332420	332421	+	ORF	Y	6.25976	N	0.0794625
27	BDF2	YDL070W	IV	332423	332424	+	ORF	Y	5.85197	N	0.42647
27	BDF2	YDL070W	IV	332625	332626	+	ORF	Y	4.46711	N	0.042374
28	SNR47	YNCD0010C	IV	541736	541737	-	snoRNA	Y	11.616	Y	8.87517
28	SNR47	YNCD0010C	IV	541770	541771	-	snoRNA	Y	11.0678	N	3.57869
28	SNR47	YNCD0010C	IV	541773	541774	-	snoRNA	Y	7.21136	N	1.74708
28	SNR47	YNCD0010C	IV	541774	541775	-	snoRNA	Y	12.2947	Y	5.75441
29	SSY1	YDR160W	IV	778005	778006	+	ORF	N	6.13857	N	3.06577
30	SEC7	YDR170C	IV	799184	799185	-	ORF	N	7.93937	Y	9.53338
31	HEM1	YDR232W	IV	927568	927569	-	antisense	N	10.5772	Y	4.72825
32	YDR246W-A/VHS1	YDR246W-A/YDR247W	IV	955865	955866	+	intergenic	N	5.45726	N	-1.36214
33	GLO2	YDR272W	IV	1009502	1009503	+	ORF	N	6.47181	N	0.292069
34	SRP101	YDR292C	IV	1043391	1043392	-	ORF	N	8.13142	Y	5.90231
35	TRP4	YDR354W	IV	1185479	1185480	+	ORF	N	8.12961	Y	8.32359
36	ARO10/YRA1	YDR380W/YDR381W	IV	1236270	1236271	+	intergenic	Y	5.95965	N	0
37	NPL3/GPI17	YDR432W/YDR434W	IV	1330790	1330791	+	intergenic	Y	9.89261	N	1.0085
37	NPL3/GPI17	YDR432W/YDR434W	IV	1330791	1330792	+	intergenic	Y	6.18945	N	-1.62883
37	NPL3/GPI17	YDR432W/YDR434W	IV	1330792	1330793	+	intergenic	Y	8.75897	N	0.0159995
37	NPL3/GPI17	YDR432W/YDR434W	IV	1330823	1330824	+	intergenic	Y	6.87797	N	3.48032
37	NPL3/GPI17	YDR432W/YDR434W	IV	1330824	1330825	+	intergenic	Y	12.4199	Y	9.94854
37	NPL3/GPI17	YDR432W/YDR434W	IV	1330825	1330826	+	intergenic	Y	11.0529	Y	7.09315
37	NPL3/GPI17	YDR432W/YDR434W	IV	1330826	1330827	+	intergenic	Y	8.21181	N	3.77792
37	NPL3/GPI17	YDR432W/YDR434W	IV	1330827	1330828	+	intergenic	Y	12.1548	N	1.16163
37	NPL3/GPI17	YDR432W/YDR434W	IV	1330828	1330829	+	intergenic	Y	7.65316	N	-0.243464
37	NPL3/GPI17	YDR432W/YDR434W	IV	1330829	1330830	+	intergenic	Y	6.7056	N	-0.682511
38	DOT1	YDR440W	IV	1343825	1343826	+	ORF	N	8.81403	Y	5.50354
39	APT2/SSN2	YDR441C/YDR443C	IV	1345556	1345557	-	intergenic	N	9.32441	Y	6.39226
40	TFB3	YDR460W	IV	1383931	1383932	+	ORF	N	7.88797	N	0.221238
41	YDR476C	YDR476C	IV	1410816	1410817	+	antisense	N	8.54491	Y	8.2561
42	YDR514C	YDR514C	IV	1471859	1471860	-	ORF	N	8.51225	N	-0.238475
42	YDR514C	YDR514C	IV	1471861	1471862	-	ORF	N	9.36013	N	0.72016
42	YDR514C	YDR514C	IV	1471862	1471863	-	ORF	N	9.18203	N	1.03438
42	YDR514C	YDR514C	IV	1471864	1471865	-	ORF	N	8.31292	N	2.14735
42	YDR514C	YDR514C	IV	1471865	1471866	-	ORF	N	8.50469	N	3.29764
42	YDR514C	YDR514C	IV	1471866	1471867	-	ORF	N	11.4579	Y	9.659
42	YDR514C	YDR514C	IV	1471920	1471921	-	ORF	N	8.94806	N	0.0184365
42	YDR514C	YDR514C	IV	1471921	1471922	-	ORF	N	9.90807	Y	5.6066
43	SNR84	YNCD0032C	IV	1493025	1493026	-	snoRNA	N	8.78306	N	-0.354877
43	SNR84	YNCD0032C	IV	1493051	1493052	-	snoRNA	N	7.92668	N	2.59319	SNR84 is thought to be capped, but it seems to be processed and has a predicted stemloop
43	SNR84	YNCD0032C	IV	1493052	1493053	-	snoRNA	N	9.29931	Y	10.8594	SNR84 is thought to be capped, but it seems to be processed and has a predicted stemloop
43	SNR84	YNCD0032C	IV	1493099	1493100	-	snoRNA	N	7.63333	N	3.33788	SNR84 is thought to be capped, but it seems to be processed and has a predicted stemloop
44	PAN6	YIL145C	IX	77097	77098	-	ORF	N	8.58174	Y	8.53841
44	PAN6	YIL145C	IX	77098	77099	-	ORF	N	10.4831	Y	7.96632
44	PAN6	YIL145C	IX	77133	77134	-	ORF	N	9.27529	Y	8.68807
45	SNR68	YNCI0001W	IX	96978	96979	+	snoRNA	Y	9.44229	N	2.93312	dicistronic
45	SNR68	YNCI0001W	IX	96979	96980	+	snoRNA	Y	12.13	N	1.67736	SNR68 is thought to be uncapped, but the precise processing sites have not been mapped, to the best of our knowledge
45	SNR68	YNCI0001W	IX	96980	96981	+	snoRNA	Y	7.67206	N	0	SNR68 is thought to be uncapped, but the precise processing sites have not been mapped, to the best of our knowledge
45	SNR68	YNCI0001W	IX	96981	96982	+	snoRNA	Y	8.70302	N	3.79915	SNR68 is thought to be uncapped, but the precise processing sites have not been mapped, to the best of our knowledge
45	SNR68	YNCI0001W	IX	97014	97015	+	snoRNA	Y	9.59274	Y	9.78179	SNR68 is thought to be uncapped, but the precise processing sites have not been mapped, to the best of our knowledge
45	SNR68	YNCI0001W	IX	97015	97016	+	snoRNA	Y	8.54871	Y	7.88865	SNR68 is thought to be uncapped, but the precise processing sites have not been mapped, to the best of our knowledge
46	QDR1	YIL120W	IX	135771	135772	+	ORF	N	7.9726	N	0
46	QDR1	YIL120W	IX	135772	135773	+	ORF	N	8.77764	Y	9.76499
46	QDR1	YIL120W	IX	135774	135775	+	ORF	N	7.68308	N	1.45838
47	PFK26	YIL107C	IX	165528	165529	+	antisense	N	7.98905	Y	6.92021
48	YIL089W/tE(CUC)I	YIL089W/YNCI0004W	IX	197152	197153	+	intergenic	N	7.85663	Y	4.28524
48	YIL089W/tE(CUC)I	YIL089W/YNCI0004W	IX	197153	197154	+	intergenic	N	8.16635	Y	5.39081
49	PCL7	YIL050W	IX	259219	259220	-	antisense	N	6.0892	Y	11.2263
50	SYG1	YIL047C	IX	265271	265272	-	ORF	N	7.43712	Y	6.85704
51	AVT2	YEL064C	V	29922	29923	-	ORF	N	7.98466	N	-2.26776
52	SNR67/SNR53	YNCE0002W/YNCE0003W	V	61180	61181	+	snoRNA	Y	9.08135	Y	7.7381
52	SNR67/SNR53	YNCE0002W/YNCE0003W	V	61605	61606	+	snoRNA	Y	7.97283	Y	7.65862	dicistronic
53	GLY1/FRD1	YEL046C/YEL047C	V	67320	67321	-	intergenic	N	6.7847	N	-0.143895	intergenic region contains ncRNA
54	SNR14 (U4)	YNCE0011C	V	167256	167257	-	snRNA	Y	10.0505	Y	12.3608
54	SNR14 (U4)	YNCE0011C	V	167288	167289	-	snRNA	Y	8.27458	N	0
54	SNR14 (U4)	YNCE0011C	V	167290	167291	-	snRNA	Y	9.20339	Y	8.00331
55	RPS8B/SSA4	YER102W/YER103W	V	363890	363891	+	intergenic	N	8.93862	Y	4.93955
55	RPS8B/SSA4	YER102W/YER103W	V	363891	363892	+	intergenic	N	5.84562	N	1.45838
55	RPS8B/SSA4	YER102W/YER103W	V	363892	363893	+	intergenic	N	4.81836	N	0
55	RPS8B/SSA4	YER102W/YER103W	V	363950	363951	+	intergenic	N	10.64	N	3.93658
55	RPS8B/SSA4	YER102W/YER103W	V	363952	363953	+	intergenic	N	6.6393	N	0
55	RPS8B/SSA4	YER102W/YER103W	V	363953	363954	+	intergenic	N	9.22346	N	0
55	RPS8B/SSA4	YER102W/YER103W	V	363955	363956	+	intergenic	N	6.66165	N	0
56	SLX8/SPR6	YER116C/YER115C	V	395314	395315	-	intergenic	Y	7.17183	N	1.31997
56	SLX8/SPR6	YER116C/YER115C	V	395315	395316	-	intergenic	Y	6.33929	N	-3.22745
56	SLX8/SPR6	YER116C/YER115C	V	395316	395317	-	intergenic	Y	8.51473	N	-1.01153
56	SLX8/SPR6	YER116C/YER115C	V	395317	395318	-	intergenic	Y	7.95805	N	1.08141
56	SLX8/SPR6	YER116C/YER115C	V	395318	395319	-	intergenic	Y	9.47612	N	2.09265
57	SLX8	YER116C	V	395470	395471	-	ORF	N	6.41934	N	0.994075
58	DSE1	YER124C	V	408141	408142	-	ORF	N	9.25684	Y	4.56834
58	DSE1	YER124C	V	408142	408143	-	ORF	N	7.98278	Y	8.93805
59	SNR52	YNCE0020C	V	431284	431285	-	snoRNA	Y	8.19177	Y	5.41626
60	YER138W-A	YER138W-A	V	449538	449539	+	ORF	N	4.16932	N	0.17606
61	YER145C-A	YER145C-A	V	462571	462572	-	ORF	N	10.7251	N	1.75965
62	GCG1/CHD1	YER163C/YER164W	V	504872	504873	+	intergenic	N	9.96836	Y	8.15985	intergenic region contains ncRNA
62	GCG1/CHD1	YER163C/YER164W	V	504876	504877	+	intergenic	N	7.76494	N	-1.09901	intergenic region contains ncRNA
62	GCG1/CHD1	YER163C/YER164W	V	504879	504880	+	intergenic	N	8.59227	N	-0.390609	intergenic region contains ncRNA
63	SNZ3/THI5	YFL059W/YFL058W	VI	12486	12487	+	intergenic	N	8.37659	N	2.89925
64	YFL051C/AQY3	YFL051C/YFL054C	VI	27119	27120	-	intergenic	N	8.34914	Y	8.78404
65	HXK1	YFR053C	VI	254077	254078	-	ORF	N	7.48283	Y	8.12158
66	POX1	YGL205W	VII	108436	108437	-	antisense	N	8.0187	Y	9.2214
66	POX1	YGL205W	VII	108437	108438	-	antisense	N	7.54311	Y	5.90944
66	POX1	YGL205W	VII	108472	108473	-	antisense	N	12.1901	Y	8.56501
67	HUL5	YGL141W	VII	239275	239276	+	ORF	N	9.1506	Y	8.05532
68	RPS2	YGL123W	VII	277782	277783	+	ORF	N	5.94621	Y	7.99885
69	MMS2	YGL087C	VII	346849	346850	-	intronic	N	8.88307	Y	10.442
70	SNR39B	YNCG0015C	VII	366567	366568	-	snoRNA	Y	10.3553	Y	9.30067
71	TIF4632/ERV14	YGL049C/YGL054C	VII	402274	402275	-	intergenic	N	8.10808	Y	5.08242
71	TIF4632/ERV14	YGL049C/YGL054C	VII	402275	402276	-	intergenic	N	7.74122	Y	4.12615
72	SNR46	YNCG0024W	VII	545240	545241	+	snoRNA	Y	8.96979	Y	5.98109	intronic
72	SNR46	YNCG0024W	VII	545275	545276	+	snoRNA	Y	9.47099	Y	7.59698
73	RPL26B	YGR034W	VII	555834	555835	+	intronic	N	4.18665	N	-0.64887
73	RPL26B	YGR034W	VII	555836	555837	+	intronic	N	4.36392	N	-0.525477
73	RPL26B	YGR034W	VII	555837	555838	+	intronic	N	4.63574	N	0.0506755
74	SNR48	YNCG0026W	VII	609469	609470	+	snoRNA	Y	7.68559	N	0
74	SNR48	YNCG0026W	VII	609505	609506	+	snoRNA	Y	11.3446	Y	7.94392
75	SKN1/THI4	YGR143W/YGR144W	VII	778076	778077	+	intergenic	Y	6.58888	N	0	intergenic region contains ncRNA
76	YGR161C-D/RTS3	YGR161C-D/YGR161C	VII	811334	811335	-	intergenic	N	5.80983	N	3.06807
77	SNR7-L (U5)	YNCG0044C	VII	939395	939396	-	snRNA	Y	6.94305	N	-0.015696
77	SNR7-L (U5)	YNCG0044C	VII	939396	939397	-	snRNA	Y	12.3882	N	2.79005
77	SNR7-L (U5)	YNCG0044C	VII	939397	939398	-	snRNA	Y	8.55678	Y	10.7567
77	SNR7-L (U5)	YNCG0044C	VII	939430	939431	-	snRNA	Y	8.10395	N	0
77	SNR7-L (U5)	YNCG0044C	VII	939431	939432	-	snRNA	Y	11.2805	N	3.90426
78	MTM1	YGR257C	VII	1006613	1006614	-	ORF	N	9.5175	Y	5.83858
79	YOR1	YGR281W	VII	1055727	1055728	+	ORF	N	7.42715	Y	9.65742
80	ARN2	YHL047C	VIII	9497	9498	-	ORF	Y	9.93516	Y	7.67011
81	RPL8A/SBP1	YHL033C/YHL034C	VIII	34679	34680	-	intergenic	Y	7.1312	N	-0.448267
81	RPL8A/SBP1	YHL033C/YHL034C	VIII	34680	34681	-	intergenic	Y	5.48973	N	-1.0618
81	RPL8A/SBP1	YHL033C/YHL034C	VIII	34681	34682	-	intergenic	Y	6.01408	N	0.319038
81	RPL8A/SBP1	YHL033C/YHL034C	VIII	34682	34683	-	intergenic	Y	7.57428	N	0.266441
81	RPL8A/SBP1	YHL033C/YHL034C	VIII	34683	34684	-	intergenic	Y	9.04816	N	3.20979
81	RPL8A/SBP1	YHL033C/YHL034C	VIII	34684	34685	-	intergenic	Y	6.45465	N	-0.239801
81	RPL8A/SBP1	YHL033C/YHL034C	VIII	34685	34686	-	intergenic	Y	11.6722	N	0.0895
81	RPL8A/SBP1	YHL033C/YHL034C	VIII	34686	34687	-	intergenic	Y	9.83028	N	1.51773
81	RPL8A/SBP1	YHL033C/YHL034C	VIII	34687	34688	-	intergenic	Y	8.91115	N	-0.02818
81	RPL8A/SBP1	YHL033C/YHL034C	VIII	34688	34689	-	intergenic	Y	11.6747	N	1.55235
81	RPL8A/SBP1	YHL033C/YHL034C	VIII	34689	34690	-	intergenic	Y	10.8474	N	3.37021
81	RPL8A/SBP1	YHL033C/YHL034C	VIII	34690	34691	-	intergenic	Y	10.9487	Y	4.39409
81	RPL8A/SBP1	YHL033C/YHL034C	VIII	34691	34692	-	intergenic	Y	10.2252	Y	9.01379
81	RPL8A/SBP1	YHL033C/YHL034C	VIII	34729	34730	-	intergenic	Y	7.93987	N	-0.783449
81	RPL8A/SBP1	YHL033C/YHL034C	VIII	34730	34731	-	intergenic	Y	8.16026	N	-1.41456
81	RPL8A/SBP1	YHL033C/YHL034C	VIII	34732	34733	-	intergenic	Y	7.03724	N	-1.83816
81	RPL8A/SBP1	YHL033C/YHL034C	VIII	34733	34734	-	intergenic	Y	11.146	N	-2.83385
81	RPL8A/SBP1	YHL033C/YHL034C	VIII	34734	34735	-	intergenic	Y	9.95793	N	-2.19414
81	RPL8A/SBP1	YHL033C/YHL034C	VIII	34735	34736	-	intergenic	Y	10.0545	N	0.49444
81	RPL8A/SBP1	YHL033C/YHL034C	VIII	34736	34737	-	intergenic	Y	10.2506	N	3.01381
82	TRM5/PCL5	YHR070W/YHR071W	VIII	236651	236652	+	intergenic	N	4.77011	N	-1.68559
83	KIC1	YHR102W	VIII	317354	317355	+	ORF	N	7.68112	Y	7.95427
83	KIC1	YHR102W	VIII	317355	317356	+	ORF	N	6.9802	N	-0.446135
84	SPL2	YHR136C	VIII	374978	374979	-	ORF	N	5.93797	N	0
84	SPL2	YHR136C	VIII	374995	374996	-	ORF	N	6.07747	N	0
84	SPL2	YHR136C	VIII	375006	375007	-	ORF	N	6.53423	N	0
84	SPL2	YHR136C	VIII	375007	375008	-	ORF	N	6.19071	N	1.31997
85	WSS1/ARO9	YHR134W/YHR137W	VIII	375124	375125	+	intergenic	N	5.85397	Y	6.00721
85	WSS1/ARO9	YHR134W/YHR137W	VIII	375130	375131	+	intergenic	N	8.31706	N	0
85	WSS1/ARO9	YHR134W/YHR137W	VIII	375145	375146	+	intergenic	N	6.84107	N	0
85	WSS1/ARO9	YHR134W/YHR137W	VIII	375397	375398	+	intergenic	N	4.40782	N	0
85	WSS1/ARO9	YHR134W/YHR137W	VIII	375419	375420	+	intergenic	N	6.42553	N	0
86	SNR71	YNCH0014W	VIII	411172	411173	+	snoRNA	Y	10.1019	Y	9.40351
86	SNR71	YNCH0014W	VIII	411173	411174	+	snoRNA	Y	8.74149	N	2.89925
86	SNR71	YNCH0014W	VIII	411246	411247	-	antisense	N	7.16901	Y	5.8057
86	SNR71	YNCH0014W	VIII	411311	411312	-	antisense	N	4.8531	N	-0.44968
86	SNR71	YNCH0014W	VIII	411312	411313	-	antisense	N	5.64494	N	1.30842
86	SNR71	YNCH0014W	VIII	411313	411314	-	antisense	N	7.78933	N	2.36931
86	SNR71	YNCH0014W	VIII	411357	411358	-	antisense	N	5.5702	N	0.683805
87	FMO1	YHR176W	VIII	455879	455880	-	antisense	N	7.88082	N	0.70867
87	FMO1	YHR176W	VIII	455880	455881	-	antisense	N	8.19181	Y	7.72922
88	GPI16	YHR188C	VIII	482805	482806	-	ORF	N	6.47611	Y	6.427
89	FMP33	YJL161W	X	117499	117500	-	antisense	N	7.72297	N	1.31997
89	FMP33	YJL161W	X	117503	117504	-	antisense	N	7.51138	Y	8.35132
89	FMP33	YJL161W	X	117539	117540	-	antisense	N	7.83918	N	2.03085
90	SNR190/SNR128	YNCJ0004C/YNCJ0003C	X	139690	139691	-	snoRNA	Y	8.21308	N	0.732256	dicistronic
90	SNR190/SNR128	YNCJ0004C/YNCJ0003C	X	139744	139745	-	snoRNA	Y	8.6049	N	2.01791	dicistronic
90	SNR190/SNR128	YNCJ0004C/YNCJ0003C	X	139745	139746	-	snoRNA	Y	9.43314	N	1.75965	dicistronic
90	SNR190/SNR128	YNCJ0004C/YNCJ0003C	X	139746	139747	-	snoRNA	Y	7.18439	Y	4.59607	dicistronic
90	SNR190/SNR128	YNCJ0004C/YNCJ0003C	X	139747	139748	-	snoRNA	Y	11.8879	Y	9.41426	dicistronic
90	SNR190/SNR128	YNCJ0004C/YNCJ0003C	X	139991	139992	-	snoRNA	Y	8.17525	Y	9.26115	dicistronic
91	URA2	YJL130C	X	166308	166309	-	ORF	N	5.95169	N	2.61982
92	SNR60	YNCJ0009C	X	349300	349301	-	snoRNA	Y	11.9668	Y	7.09859
92	SNR60	YNCJ0009C	X	349301	349302	-	snoRNA	Y	8.1311	N	0.45991
92	SNR60	YNCJ0009C	X	349302	349303	-	snoRNA	Y	9.10403	Y	6.51628
92	SNR60	YNCJ0009C	X	349389	349390	-	snoRNA	Y	6.26972	Y	5.00794
93	SUP7/tR(UCU)J1	YNCJ0010W/YNCJ0011W	X	354547	354548	+	intergenic	N	7.85663	Y	4.28524
93	SUP7/tR(UCU)J1	YNCJ0010W/YNCJ0011W	X	354548	354549	+	intergenic	N	8.16635	Y	5.39081
94	YJL015C/BBC1	YJL015C/YJL020C	X	405144	405145	-	intergenic	N	9.20339	Y	5.95538
95	AVT1	YJR001W	X	438279	438280	+	ORF	N	9.60618	Y	6.15489
96	IRT1	YNCJ0028C	X	606739	606740	-	ORF	N	10.0762	Y	6.33207
96	IRT1	YNCJ0028C	X	606740	606741	-	ORF	N	8.18576	Y	4.5128
96	IRT1	YNCJ0028C	X	606979	606980	-	ORF	N	7.35015	N	1.74708
96	IRT1	YNCJ0028C	X	606980	606981	-	ORF	N	7.59224	N	2.76791
97	SNR64	YNCK0001W	XI	38746	38747	+	snoRNA	Y	10.8164	Y	10.3609
97	SNR64	YNCK0001W	XI	38747	38748	+	snoRNA	Y	7.97984	Y	5.0713
98	RPL17A	YKL180W	XI	110261	110262	+	3'	Y	6.65788	Y	5.6746
99	VPH2	YKL119C	XI	219145	219146	-	ORF	N	7.16451	Y	7.96869
100	SNR69	YNCK0013W	XI	364729	364730	+	snoRNA	Y	10.8629	Y	4.49894	SNR68 is thought to be uncapped, but the precise processing sites have not been mapped, to the best of our knowledge
101	TCD2/SKA1	YKL027W/YKL023W	XI	390051	390052	+	intergenic	N	7.26142	N	0
102	SNR87	YNCK0015C	XI	431218	431219	-	snoRNA	Y	9.04897	Y	6.70789
103	CAF4	YKR036C	XI	508942	508943	-	ORF	N	7.16686	Y	7.93253
103	CAF4	YKR036C	XI	508943	508944	-	ORF	N	7.8456	Y	8.31944
103	CAF4	YKR036C	XI	508944	508945	-	ORF	N	11.2932	Y	9.75352
103	CAF4	YKR036C	XI	508945	508946	-	ORF	N	7.67604	Y	8.89011
103	CAF4	YKR036C	XI	508977	508978	-	ORF	N	7.67182	N	-2.23189
103	CAF4	YKR036C	XI	508978	508979	-	ORF	N	13.0163	N	0.541908
103	CAF4	YKR036C	XI	508979	508980	-	ORF	N	10.2161	Y	5.05686
103	CAF4	YKR036C	XI	508980	508981	-	ORF	N	8.72357	Y	5.87065
104	UBI4	YLL039C	XII	64682	64683	-	ORF	N	6.99285	Y	6.93376
105	SMF3/RPL15A	YLR034C/YLR029C	XII	204171	204172	-	intergenic	N	8.4621	N	2.98482
105	SMF3/RPL15A	YLR034C/YLR029C	XII	204173	204174	-	intergenic	N	9.95901	Y	11.2094
105	SMF3/RPL15A	YLR034C/YLR029C	XII	204207	204208	-	intergenic	N	7.71388	N	2.6974
106	SNR79	YNCL0005C	XII	348530	348531	-	snoRNA	Y	8.95931	Y	8.58507
106	SNR79	YNCL0005C	XII	348600	348601	-	snoRNA	Y	9.57042	N	2.78045
107	RDN37-1	YNCL0010C	XII	451719	451720	-	rRNA	Y	7.65259	N	-0.263829
107	RDN37-1	YNCL0010C	XII	451721	451722	-	rRNA	Y	4.76662	N	-1.0977
107	RDN37-1	YNCL0010C	XII	451725	451726	-	rRNA	Y	6.47152	N	-0.563254
107	RDN37-1	YNCL0010C	XII	451726	451727	-	rRNA	Y	8.7705	N	-0.0114798
107	RDN37-1	YNCL0010C	XII	451727	451728	-	rRNA	Y	8.94633	N	-0.212688
107	RDN37-1	YNCL0010C	XII	451728	451729	-	rRNA	Y	8.59608	N	-0.113908
107	RDN37-1	YNCL0010C	XII	451729	451730	-	rRNA	Y	7.01641	N	0.0233495
107	RDN37-1	YNCL0010C	XII	451730	451731	-	rRNA	Y	6.23949	N	0.0455325
107	RDN37-1	YNCL0010C	XII	451731	451732	-	rRNA	Y	10.6057	N	0.992633
107	RDN37-1	YNCL0010C	XII	451732	451733	-	rRNA	Y	10.6793	N	2.24961
107	RDN37-1	YNCL0010C	XII	451733	451734	-	rRNA	Y	11.3195	N	3.68465
107	RDN37-1	YNCL0010C	XII	451734	451735	-	rRNA	Y	11.4797	Y	9.56859
107	RDN37-1	YNCL0010C	XII	451768	451769	-	rRNA	Y	9.05795	N	-2.22511
107	RDN37-1	YNCL0010C	XII	451769	451770	-	rRNA	Y	10.3871	N	-1.01927
107	RDN37-1/RDN5-1	YNCL0010C/YNCL0018W	XII	458806	458807	+	intergenic	N	4.53292	N	0.832193
107	RDN5-1	YNCL0018W	XII	459691	459692	-	rRNA	Y	6.65959	Y	4.66656
107	RDN5-1	YNCL0018W	XII	459707	459708	-	rRNA	Y	6.36516	N	3.9952
107	RDN5-1	YNCL0018W	XII	459873	459874	-	rRNA	Y	7.6318	N	-0.270951
107	RDN5-1	YNCL0018W	XII	459876	459877	-	rRNA	Y	6.58781	N	1.37208
107	RDN5-1	YNCL0018W	XII	459879	459880	-	rRNA	Y	5.14371	N	-0.188143
107	RDN5-1	YNCL0018W	XII	459884	459885	-	rRNA	Y	5.19433	N	0.428816
107	RDN5-1	YNCL0018W	XII	459885	459886	-	rRNA	Y	6.02926	N	0.205544
107	RDN5-1	YNCL0018W	XII	459887	459888	-	rRNA	Y	5.341	N	0.037004
107	RDN5-1	YNCL0018W	XII	459888	459889	-	rRNA	Y	4.66343	N	-0.208062
107	RDN5-1	YNCL0018W	XII	459889	459890	-	rRNA	Y	4.98903	N	-0.0073845
107	RDN5-1	YNCL0018W	XII	459894	459895	-	rRNA	Y	7.41268	N	0.288415
107	RDN5-1	YNCL0018W	XII	459895	459896	-	rRNA	Y	6.73182	N	-0.082568
107	RDN5-1	YNCL0018W	XII	459896	459897	-	rRNA	Y	7.15338	N	0.061917
107	RDN5-1	YNCL0018W	XII	459897	459898	-	rRNA	Y	7.78808	N	1.22246
107	RDN5-1	YNCL0018W	XII	459898	459899	-	rRNA	Y	8.48023	N	1.44025
107	RDN5-1	YNCL0018W	XII	459899	459900	-	rRNA	Y	7.9772	Y	5.06432
107	RDN5-1	YNCL0018W	XII	459900	459901	-	rRNA	Y	9.35093	Y	8.69769
107	RDN5-1	YNCL0018W	XII	459958	459959	-	rRNA	Y	9.0639	N	0.451435
107	RDN5-1	YNCL0018W	XII	459959	459960	-	rRNA	Y	7.15719	N	-1.02594
107	RDN5-1	YNCL0018W	XII	459962	459963	-	rRNA	Y	8.53297	N	-1.0096
107	RDN5-1	YNCL0018W	XII	459964	459965	-	rRNA	Y	9.51991	N	3.15753
107	RDN5-1	YNCL0018W	XII	460330	460331	+	rRNA	Y	4.74217	N	-2.43002
108	YLR227W-A/tL(UAG)L1	YLR227W-A/YNCL0032C	XII	592980	592981	-	intergenic	N	7.06738	N	2.31137
109	HSP60	YLR259C	XII	663330	663331	-	ORF	Y	8.28204	Y	4.19219
110	RPS28B/YLR264C-A	YLR264W/YLR264C-A	XII	673724	673725	+	intergenic	N	6.91052	N	1.58272
111	MID2	YLR332W	XII	791393	791394	+	ORF	N	7.49652	Y	4.37794
112	SNR57/SNR55/SNR61	YNCL0043C/YNCL0042C/YNCL0041C	XII	794638	794639	-	snoRNA	Y	7.98524	Y	5.94705	polycistronic
112	SNR57/SNR55/SNR61	YNCL0043C/YNCL0042C/YNCL0041C	XII	794643	794644	-	snoRNA	Y	7.61956	N	0.933428	polycistronic
112	SNR57/SNR55/SNR61	YNCL0043C/YNCL0042C/YNCL0041C	XII	794644	794645	-	snoRNA	Y	6.309	N	-1.05969	polycistronic
112	SNR57/SNR55/SNR61	YNCL0043C/YNCL0042C/YNCL0041C	XII	794645	794646	-	snoRNA	Y	6.6231	N	-0.354877	polycistronic
112	SNR57/SNR55/SNR61	YNCL0043C/YNCL0042C/YNCL0041C	XII	794646	794647	-	snoRNA	Y	6.08242	N	-2.7223	polycistronic
112	SNR57/SNR55/SNR61	YNCL0043C/YNCL0042C/YNCL0041C	XII	794647	794648	-	snoRNA	Y	7.70276	N	-0.4625	polycistronic
112	SNR57/SNR55/SNR61	YNCL0043C/YNCL0042C/YNCL0041C	XII	794649	794650	-	snoRNA	Y	8.87288	Y	8.1141	polycistronic
112	SNR57/SNR55/SNR61	YNCL0043C/YNCL0042C/YNCL0041C	XII	794817	794818	-	snoRNA	Y	6.37247	Y	5.98921	polycistronic
112	SNR57/SNR55/SNR61	YNCL0043C/YNCL0042C/YNCL0041C	XII	795103	795104	-	snoRNA	Y	9.87363	Y	10.5873	polycistronic
112	SNR57/SNR55/SNR61	YNCL0043C/YNCL0042C/YNCL0041C	XII	795104	795105	-	snoRNA	Y	8.46188	Y	10.8833	polycistronic
112	SNR57/SNR55/SNR61	YNCL0043C/YNCL0042C/YNCL0041C	XII	795141	795142	-	snoRNA	Y	7.06268	Y	5.07451	polycistronic
112	SNR57/SNR55/SNR61	YNCL0043C/YNCL0042C/YNCL0041C	XII	795142	795143	-	snoRNA	Y	9.2149	Y	5.14129	polycistronic
113	GAS2/TRR4	YLR343W/YNCL0045W	XII	818307	818308	-	intergenic	N	8.67278	N	1.5254
113	GAS2/TRR4	YLR343W/YNCL0045W	XII	818343	818344	-	intergenic	N	6.3923	N	1.5254
113	GAS2/TRR4	YLR343W/YNCL0045W	XII	818345	818346	-	intergenic	N	5.65476	Y	4.8121
113	GAS2/TRR4	YLR343W/YNCL0045W	XII	818346	818347	-	intergenic	N	9.69693	Y	4.8121
113	GAS2/TRR4	YLR343W/YNCL0045W	XII	818347	818348	-	intergenic	N	8.51112	N	1.33287
113	GAS2/TRR4	YLR343W/YNCL0045W	XII	818352	818353	-	intergenic	N	5.273	Y	4.23791
113	GAS2/TRR4	YLR343W/YNCL0045W	XII	818354	818355	-	intergenic	N	7.87536	N	3.02063
113	GAS2/TRR4	YLR343W/YNCL0045W	XII	818366	818367	-	intergenic	N	8.05913	N	3.07324
114	RPS22B	YLR367W	XII	856094	856095	+	5'	Y	5.63758	N	-0.346691
114	RPS22B	YLR367W	XII	856095	856096	+	5'	Y	8.13851	N	3.34743
114	RPS22B	YLR367W	XII	856096	856097	+	5'	Y	13.0932	Y	5.40536
114	RPS22B	YLR367W	XII	856097	856098	+	5'	Y	12.1804	N	3.07134
114	RPS22B	YLR367W	XII	856098	856099	+	5'	Y	10.9889	N	2.06907
114	RPS22B	YLR367W	XII	856099	856100	+	5'	Y	13.447	N	0.899506
114	RPS22B	YLR367W	XII	856100	856101	+	5'	Y	10.0743	N	0.532486
114	RPS22B	YLR367W	XII	856101	856102	+	5'	Y	6.96706	N	-1.17484
114	RPS22B	YLR367W	XII	856102	856103	+	5'	Y	7.23571	N	0.007892
114	RPS22B	YLR367W	XII	856103	856104	+	5'	Y	5.83739	N	0.890342
114	RPS22B	YLR367W	XII	856105	856106	+	5'	Y	6.16656	N	0.116243
114	RPS22B	YLR367W	XII	856108	856109	+	5'	Y	4.93228	N	2.96411
114	RPS22B	YLR367W	XII	856130	856131	+	5'	Y	5.44524	N	0.0007995
114	RPS22B	YLR367W	XII	856132	856133	+	5'	Y	8.04642	Y	4.74663
114	RPS22B	YLR367W	XII	856133	856134	+	5'	Y	10.8065	Y	7.57379
114	RPS22B	YLR367W	XII	856134	856135	+	5'	Y	10.3111	Y	7.90672
114	RPS22B	YLR367W	XII	856135	856136	+	5'	Y	10.3972	N	2.52469
114	RPS22B	YLR367W	XII	856136	856137	+	5'	Y	10.1047	N	0.495278
114	RPS22B	YLR367W	XII	856137	856138	+	5'	Y	10.1341	N	0.911982
114	RPS22B	YLR367W	XII	856138	856139	+	5'	Y	7.80864	N	0.271575
114	RPS22B	YLR367W	XII	856139	856140	+	5'	Y	7.77549	N	-1.04421
114	RPS22B	YLR367W	XII	856140	856141	+	5'	Y	6.39278	N	-0.04291
114	RPS22B	YLR367W	XII	856142	856143	+	5'	Y	5.09098	N	-0.431102
114	RPS22B	YLR367W	XII	856156	856157	+	5'	Y	5.19597	N	-1.98894
114	RPS22B	YLR367W	XII	856359	856360	+	5'	Y	4.68638	N	0.403926
114	RPS22B	YLR367W	XII	856360	856361	+	5'	Y	4.37519	N	-2.08739
114	RPS22B	YLR367W	XII	856361	856362	+	5'	Y	5.07153	N	0.094575
114	RPS22B	YLR367W	XII	856363	856364	+	5'	Y	5.36861	N	-0.906467
114	RPS22B	YLR367W	XII	856364	856365	+	5'	Y	6.1088	N	0.570695
114	RPS22B	YLR367W	XII	856366	856367	+	5'	Y	5.78597	N	0.369396
114	RPS22B	YLR367W	XII	856391	856392	+	5'	Y	5.1638	N	-0.629005
114	RPS22B	YLR367W	XII	856392	856393	+	5'	Y	4.58919	N	-1.50548
114	RPS22B	YLR367W	XII	856394	856395	+	5'	Y	6.27445	N	-0.172515
114	RPS22B	YLR367W	XII	856396	856397	+	5'	Y	6.27973	N	3.07129
114	RPS22B	YLR367W	XII	856399	856400	+	5'	Y	6.89077	N	-0.214718
114	RPS22B	YLR367W	XII	856400	856401	+	5'	Y	5.71042	N	-0.312748
114	RPS22B	YLR367W	XII	856401	856402	+	5'	Y	5.51426	N	-0.323945
114	RPS22B	YLR367W	XII	856402	856403	+	5'	Y	7.39278	N	-0.483812
114	RPS22B	YLR367W	XII	856403	856404	+	5'	Y	7.50578	N	-0.721961
114	RPS22B	YLR367W	XII	856404	856405	+	5'	Y	6.36171	N	-1.02705
114	RPS22B	YLR367W	XII	856406	856407	+	5'	Y	8.24861	N	0.532469
114	RPS22B	YLR367W	XII	856408	856409	+	5'	Y	5.30222	N	0.451475
114	RPS22B	YLR367W	XII	856409	856410	+	5'	Y	5.69512	N	-0.718855
114	RPS22B	YLR367W	XII	856410	856411	+	5'	Y	5.55369	N	0.186164
114	RPS22B	YLR367W	XII	856412	856413	+	5'	Y	5.67623	N	-1.01689
114	RPS22B	YLR367W	XII	856413	856414	+	5'	Y	4.70477	N	0.142918
115	SNR44	YNCL0046W	XII	856708	856709	+	snoRNA	N	5.53954	N	0.321918	intronic
116	CRN1	YLR429W	XII	991787	991788	+	ORF	N	8.46691	Y	9.02327
117	TUB3	YML124C	XIII	23507	23508	-	intronic	N	5.62108	N	0
118	SNR85	YNCM0002C	XIII	67953	67954	-	snoRNA	Y	11.9945	Y	9.75096	SNR84 is thought to be capped, but it seems to be processed and has a predicted stemloop
119	YML039W/YMD8	YML039W/YML038C	XIII	202206	202207	+	intergenic	N	5.27675	N	3.82184
119	YML039W/YMD8	YML039W/YML038C	XIII	202207	202208	+	intergenic	N	7.56044	Y	4.16453
119	YML039W/YMD8	YML039W/YML038C	XIII	202208	202209	+	intergenic	N	6.82423	N	1.07459
119	YML039W/YMD8	YML039W/YML038C	XIII	202209	202210	+	intergenic	N	4.99051	N	0
120	SNR78-SNR72	YNCM0011W-YNCM0017W	XIII	297435	297436	+	snoRNA	Y	11.8227	Y	9.87223	polycistronic
120	SNR78-SNR72	YNCM0011W-YNCM0017W	XIII	297436	297437	+	snoRNA	Y	7.98205	N	1.28987	polycistronic
120	SNR78-SNR72	YNCM0011W-YNCM0017W	XIII	297437	297438	+	snoRNA	Y	8.39016	N	-2.55739	polycistronic
120	SNR78-SNR72	YNCM0011W-YNCM0017W	XIII	297649	297650	+	snoRNA	Y	9.22781	Y	4.07438	polycistronic
120	SNR78-SNR72	YNCM0011W-YNCM0017W	XIII	297689	297690	+	snoRNA	Y	8.45919	Y	4.92096	polycistronic
120	SNR78-SNR72	YNCM0011W-YNCM0017W	XIII	297690	297691	+	snoRNA	Y	13.6632	Y	10.9684	polycistronic
120	SNR78-SNR72	YNCM0011W-YNCM0017W	XIII	297691	297692	+	snoRNA	Y	8.837	N	0.962231	polycistronic
120	SNR78-SNR72	YNCM0011W-YNCM0017W	XIII	298051	298052	+	snoRNA	Y	10.1056	Y	8.56903	polycistronic
120	SNR78-SNR72	YNCM0011W-YNCM0017W	XIII	298052	298053	+	snoRNA	Y	7.9602	N	1.96385	polycistronic
120	SNR78-SNR72	YNCM0011W-YNCM0017W	XIII	298484	298485	+	snoRNA	Y	8.12906	Y	7.63792	polycistronic
120	SNR78-SNR72	YNCM0011W-YNCM0017W	XIII	298485	298486	+	snoRNA	Y	8.60527	Y	7.76027	polycistronic
121	BUB2	YMR055C	XIII	386661	386662	+	antisense	N	7.15128	Y	4.66432
121	BUB2	YMR055C	XIII	386662	386663	+	antisense	N	7.28108	N	1.90897
122	ASC1	YMR116C	XIII	500546	500547	-	ORF	N	8.64767	Y	4.27574
122	ASC1	YMR116C	XIII	500547	500548	-	ORF	N	8.61977	Y	5.77139
123	SNR83	YNCM0030W	XIII	626287	626288	+	snoRNA	Y	8.11142	N	2.7992
123	SNR83	YNCM0030W	XIII	626321	626322	+	snoRNA	Y	12.965	Y	8.1792
123	SNR83	YNCM0030W	XIII	626322	626323	+	snoRNA	Y	9.21682	N	3.99867
123	SNR83	YNCM0030W	XIII	626348	626349	+	snoRNA	Y	6.94339	N	1.57618
124	GCV2	YMR189W	XIII	639791	639792	+	ORF	N	7.91179	N	2.48478
125	RAD14	YMR201C	XIII	666286	666287	-	ORF	N	5.93921	Y	7.15423
126	FSH2	YMR222C	XIII	716282	716283	-	ORF	N	7.3611	Y	6.85572
127	GAD1	YMR250W	XIII	772354	772355	+	ORF	N	6.28041	N	1.60451
127	GAD1	YMR250W	XIII	772359	772360	+	ORF	N	4.92614	N	-0.433139
128	UBP15	YMR304W	XIII	878459	878460	+	ORF	N	7.74144	Y	6.39943
128	UBP15	YMR304W	XIII	878496	878497	+	ORF	N	7.70028	N	-1.32698
129	YMR317W	YMR317W	XIII	907909	907910	-	antisense	N	9.29384	Y	8.32662
129	YMR317W	YMR317W	XIII	907910	907911	-	antisense	N	7.491	Y	9.605
130	SNZ2/THI2	YNL333W/YBR240C	XIV	14389	14390	+	intergenic	N	8.37659	N	2.89925
131	RPL18B	YNL301C	XIV	64599	64600	-	5'	N	4.34985	N	-2.55876
131	RPL18B	YNL301C	XIV	64609	64610	-	5'	N	6.19202	N	0
132	SNR40	YNCN0001W	XIV	89140	89141	+	snoRNA	Y	7.25942	Y	5.60945
132	SNR40	YNCN0001W	XIV	89370	89371	+	snoRNA	Y	10.9862	Y	9.61531
132	SNR40	YNCN0001W	XIV	89371	89372	+	snoRNA	Y	12.2978	Y	6.16578
132	SNR40	YNCN0001W	XIV	89372	89373	+	snoRNA	Y	9.91751	N	1.18241
132	SNR40	YNCN0001W	XIV	89373	89374	+	snoRNA	Y	8.06776	N	1.64451
132	SNR40	YNCN0001W	XIV	89374	89375	+	snoRNA	Y	7.42	N	-0.324441
132	SNR40	YNCN0001W	XIV	89376	89377	+	snoRNA	Y	7.41797	N	0.0627655
132	SNR40	YNCN0001W	XIV	89377	89378	+	snoRNA	Y	8.93032	N	2.05866
132	SNR40	YNCN0001W	XIV	89379	89380	+	snoRNA	Y	6.95993	N	0.910082
132	SNR40	YNCN0001W	XIV	89381	89382	+	snoRNA	Y	6.42553	N	-1.22029
133	SNR19 (U1)	YNCN0005C	XIV	229983	229984	-	snRNA	Y	8.56199	N	-1.85516	intronic
133	SNR19 (U1)	YNCN0005C	XIV	229984	229985	-	snRNA	Y	9.39581	N	1.97608
133	SNR19 (U1)	YNCN0005C	XIV	229985	229986	-	snRNA	Y	10.6549	Y	9.67113
133	SNR19 (U1)	YNCN0005C	XIV	229986	229987	-	snRNA	Y	9.68126	N	-5.21736
133	SNR19 (U1)	YNCN0005C	XIV	230016	230017	-	snRNA	Y	7.46311	N	1.41193
133	SNR19 (U1)	YNCN0005C	XIV	230017	230018	-	snRNA	Y	6.37389	N	-2.97222
133	SNR19 (U1)	YNCN0005C	XIV	230018	230019	-	snRNA	Y	8.35048	N	2.3867
133	SNR19 (U1)	YNCN0005C	XIV	230019	230020	-	snRNA	Y	9.06489	N	-2.143
133	SNR19 (U1)	YNCN0005C	XIV	230020	230021	-	snRNA	Y	8.78985	N	-2.97515
133	SNR19 (U1)	YNCN0005C	XIV	230021	230022	-	snRNA	Y	9.1308	Y	4.85351
134	IBD2	YNL164C	XIV	325589	325590	-	ORF	N	7.76543	N	2.72283
135	DBP2	YNL112W	XIV	415659	415660	+	intronic	N	7.62911	Y	5.39081
136	KTR5	YNL029C	XIV	578152	578153	-	ORF	N	8.05378	Y	7.46194
137	SAM50	YNL026W	XIV	582197	582198	+	ORF	N	7.25727	N	0
138	SNR66	YNCN0014W	XIV	586018	586019	+	snoRNA	Y	11.0217	Y	8.03176
139	YNR014W	YNR014W	XIV	652905	652906	+	ORF	N	8.41646	Y	4.17769
140	DSE4	YNR067C	XIV	756087	756088	-	ORF	N	6.93961	Y	4.85799
141	SMF1	YOL122C	XV	91326	91327	-	ORF	N	7.17962	Y	8.30181
141	SMF1	YOL122C	XV	91327	91328	-	ORF	N	8.85051	Y	8.78824
141	SMF1	YOL122C	XV	91388	91389	-	ORF	N	7.2315	N	-1.65133
141	SMF1	YOL122C	XV	91389	91390	-	ORF	N	6.96608	N	0.00067
142	RPL18A	YOL120C	XV	93947	93948	-	intronic	Y	6.76811	N	-0.582632
142	RPL18A	YOL120C	XV	93948	93949	-	intronic	Y	9.93971	N	0.299098
142	RPL18A	YOL120C	XV	93949	93950	-	intronic	Y	8.82386	N	-0.192769
142	RPL18A	YOL120C	XV	93950	93951	-	intronic	Y	10.4869	N	1.15044
142	RPL18A	YOL120C	XV	93951	93952	-	intronic	Y	11.113	Y	10.1793
142	RPL18A	YOL120C	XV	93952	93953	-	intronic	Y	12.1973	N	1.24364
142	RPL18A	YOL120C	XV	94155	94156	-	intronic	Y	5.7125	N	2.22335
142	RPL18A	YOL120C	XV	94156	94157	-	intronic	Y	13.8623	Y	4.2697
142	RPL18A	YOL120C	XV	94157	94158	-	intronic	Y	6.97607	N	3.50673
143	SNR58	YNCO0003C	XV	136221	136222	-	snoRNA	Y	10.4417	Y	8.30434
144	SNR81	YNCO0006W	XV	234295	234296	+	snoRNA	Y	10.6029	Y	5.4821
144	SNR81	YNCO0006W	XV	234334	234335	+	snoRNA	Y	10.1965	Y	8.50828
145	SNR50	YNCO0007W	XV	259413	259414	+	snoRNA	Y	8.87025	N	1.90897
145	SNR50	YNCO0007W	XV	259447	259448	+	snoRNA	Y	12.0921	Y	8.55349
145	SNR50	YNCO0007W	XV	259448	259449	+	snoRNA	Y	8.40859	N	-2.85973
146	MIM1	YOL026C	XV	274225	274226	-	ORF	N	8.07571	Y	5.56784
147	CMK2	YOL016C	XV	295156	295157	-	ORF	N	5.96656	Y	6.83369
147	CMK2	YOL016C	XV	295158	295159	-	ORF	N	7.24082	N	-0.487347
148	SNR62	YNCO0015C	XV	409920	409921	-	snoRNA	Y	9.73456	Y	7.91375
149	OST3	YOR085W	XV	482409	482410	-	antisense	N	7.31527	N	2.22749
150	TCB1	YOR086C	XV	483873	483874	-	ORF	N	9.31791	N	1.4389
150	TCB1	YOR086C	XV	483875	483876	-	ORF	N	6.30147	N	3.70526
150	TCB1	YOR086C	XV	483876	483877	-	ORF	N	11.2477	Y	9.9271
150	TCB1	YOR086C	XV	483935	483936	-	ORF	N	7.58698	N	2.23608
151	PFY1	YOR122C	XV	552499	552500	-	ORF	N	8.82636	N	3.78025
151	PFY1	YOR122C	XV	552533	552534	-	ORF	N	7.96943	N	2.09259
151	PFY1	YOR122C	XV	552534	552535	-	ORF	N	6.70555	Y	5.93075
152	SNR17A (U3)	YNCO0025W	XV	780617	780618	+	snoRNA	Y	10.6734	Y	8.01844
152	SNR17A (U3)	YNCO0025W	XV	780618	780619	+	snoRNA	Y	7.29002	N	-0.637045
152	SNR17A (U3)	YNCO0025W	XV	780654	780655	+	snoRNA	Y	11.2903	Y	4.50175
152	SNR17A (U3)	YNCO0025W	XV	780655	780656	+	snoRNA	Y	9.42018	N	2.39011
152	SNR17A (U3)	YNCO0025W	XV	780656	780657	+	snoRNA	Y	8.72399	N	-2.16958
152	SNR17A (U3)	YNCO0025W	XV	780657	780658	+	snoRNA	Y	8.90126	N	0.59778
152	SNR17A (U3)	YNCO0025W	XV	780658	780659	+	snoRNA	Y	10.3671	Y	11.9993
152	SNR17A (U3)	YNCO0025W	XV	780659	780660	+	snoRNA	Y	9.42885	N	1.6873
153	PAC1	YOR269W	XV	827347	827348	+	ORF	N	7.67122	Y	8.01844
153	PAC1	YOR269W	XV	827382	827383	+	ORF	N	7.13971	Y	8.69569
154	TFB6/GDS1	YOR352W/YOR355W	XV	1004169	1004170	+	intergenic	N	6.17484	Y	4.22023
155	YPL277C	YPL277C	XVI	16277	16278	-	ORF	N	9.63856	Y	7.26466
156	HSP82	YPL240C	XVI	98266	98267	-	ORF	N	4.5026	N	0.102522
157	RPL7B	YPL198W	XVI	173693	173694	+	intronic	Y	7.25566	Y	8.3791
157	RPL7B	YPL198W	XVI	173695	173696	+	intronic	Y	7.88856	N	0
158	SNR17B (U3)	YNCP0005C	XVI	280993	280994	-	snoRNA	Y	11.3885	Y	10.2832
159	IRC15/VTC3	YPL017C/YPL019C	XVI	517149	517150	-	intergenic	N	7.00369	N	-1.22158
159	IRC15/VTC3	YPL017C/YPL019C	XVI	517152	517153	-	intergenic	N	5.1166	N	1.74708
159	IRC15/VTC3	YPL017C/YPL019C	XVI	517162	517163	-	intergenic	N	7.81489	N	-1.3193
160	SUT2	YPR009W	XVI	576563	576564	-	antisense	N	8.64443	Y	5.39318
161	NTO1	YPR031W	XVI	631506	631507	+	5'	N	6.19149	N	2.6468
162	SNR41/SNR70/SNR51	YNCP0015C/YNCP0014C/YNCP0013C	XVI	718825	718826	-	snoRNA	Y	10.0401	Y	8.7936
162	SNR41/SNR70/SNR51	YNCP0015C/YNCP0014C/YNCP0013C	XVI	718864	718865	-	snoRNA	Y	7.49791	N	-0.249845	polycistronic
162	SNR41/SNR70/SNR51	YNCP0015C/YNCP0014C/YNCP0013C	XVI	718865	718866	-	snoRNA	Y	8.32433	Y	6.81772	polycistronic
162	SNR41/SNR70/SNR51	YNCP0015C/YNCP0014C/YNCP0013C	XVI	719083	719084	-	snoRNA	Y	8.57195	N	-1.652	polycistronic
162	SNR41/SNR70/SNR51	YNCP0015C/YNCP0014C/YNCP0013C	XVI	719084	719085	-	snoRNA	Y	7.25808	N	-1.3193	polycistronic
162	SNR41/SNR70/SNR51	YNCP0015C/YNCP0014C/YNCP0013C	XVI	719085	719086	-	snoRNA	Y	8.01918	N	0	polycistronic
162	SNR41/SNR70/SNR51	YNCP0015C/YNCP0014C/YNCP0013C	XVI	719086	719087	-	snoRNA	Y	9.28627	Y	7.11696	polycistronic
163	ISR1	YPR106W	XVI	740749	740750	+	ORF	N	8.40997	Y	8.5936
164	CTR1	YPR124W	XVI	786470	786471	-	ORF	N	7.09014	Y	6.28397
