# Supplementary material for: Mapping of in vivo cleavage sites uncovers a major role for yeast RNase III in regulating protein-coding genes
Source: eLife. 2026 May 18;14:RP106662. doi: 10.7554/eLife.106662 (PMC13183374; doi:10.7554/eLife.106662)
Supplement: Supplementary file 4. [file elife-106662-supp4.xlsx]

## Sheet: Sheet1
Table S4: List of oligos used in this study:
Oligo	Description	Sequence
oAV3246	SNR83 probe	GCAACTACGGTAATTGGTCC
oAV3486	BDF2 probe	TGCCTTCCTACGCAAAAGCG
oAV3233	CAF4 probe	CCTCGTTTGCGCCAACAGTG
oAV3525	PGK1 probe	CGGAACCTGGGGCAGAAGCC
oAV3566	GCG1/CHD1 probe	AACGAGAGGGTAACAGTATG
oAV3939	YDR514C_SDM_F	AGAAAATTTATAGCATGTGTTATGGCAAGAAGGGTTCATCCCTCGGTAAACTACTAAGGCTTTTTCACTTGCCACAT
oAV3940	YDR514C_SDM_R	ATGTGGCAAGTGAAAAAGCCTTAGTAGTTTACCGAGGGATGAACCCTTCTTGCCATAACACATGCTATAAATTTTCT
oAV3949	YDR514C_F_SpeI_overlap	agtttcgacggattctagaaATGAGTAGCTCCACAAAGTGCA
oAV3950	YDR514C_R_SalI_overlap	gacataactaattacatgactcgaggTCACACAAGAGTACTTTTGAAGGC
