# Supplementary figures and images for: Mapping of in vivo cleavage sites uncovers a major role for yeast RNase III in regulating protein-coding genes
Source: eLife journal article supplement (doi:10.7554/elife.106662), 2025-05-23

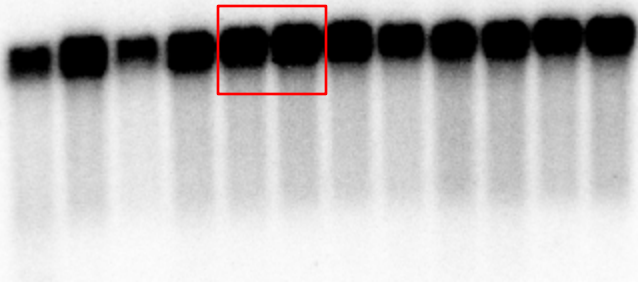

Supplement: fig2-data2 [file Fig 2E-bottom source data 2.pdf › figure 2 source datat 2/Fig 2E-bottom source data 2.pdf]

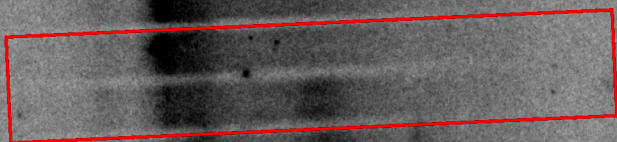

Supplement: fig2-data2 [file Fig 2E-top source data 2.pdf › figure 2 source datat 2/Fig 2E-top source data 2.pdf]

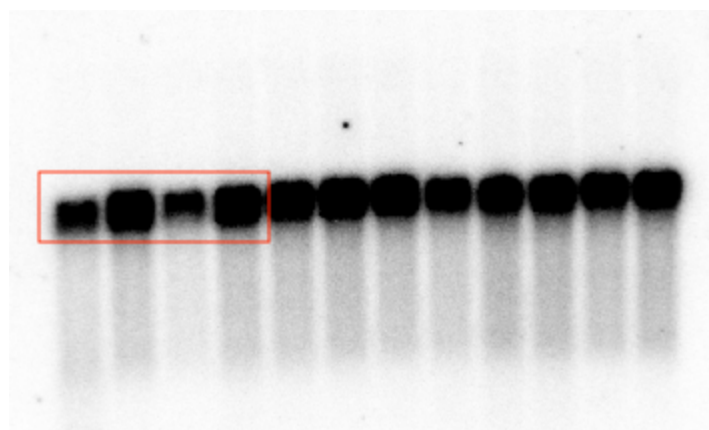

Supplement: fig5-data2 [file Fig 5B-bottom PGK1] source data 2.pdf › fugure 5 source data 2/Fig 5B-bottom PGK1] source data 2.pdf]
